# Supplementary material for: Investigating the sources of variable impact of pathogenic variants in monogenic metabolic conditions
Source: bioRxiv or medRxiv preprint supplement (doi:10.1101/2023.09.14.23295564), 2024-05-01
Supplement: Supplementary file [file media-1.pdf]

# Supplemental Figure 1

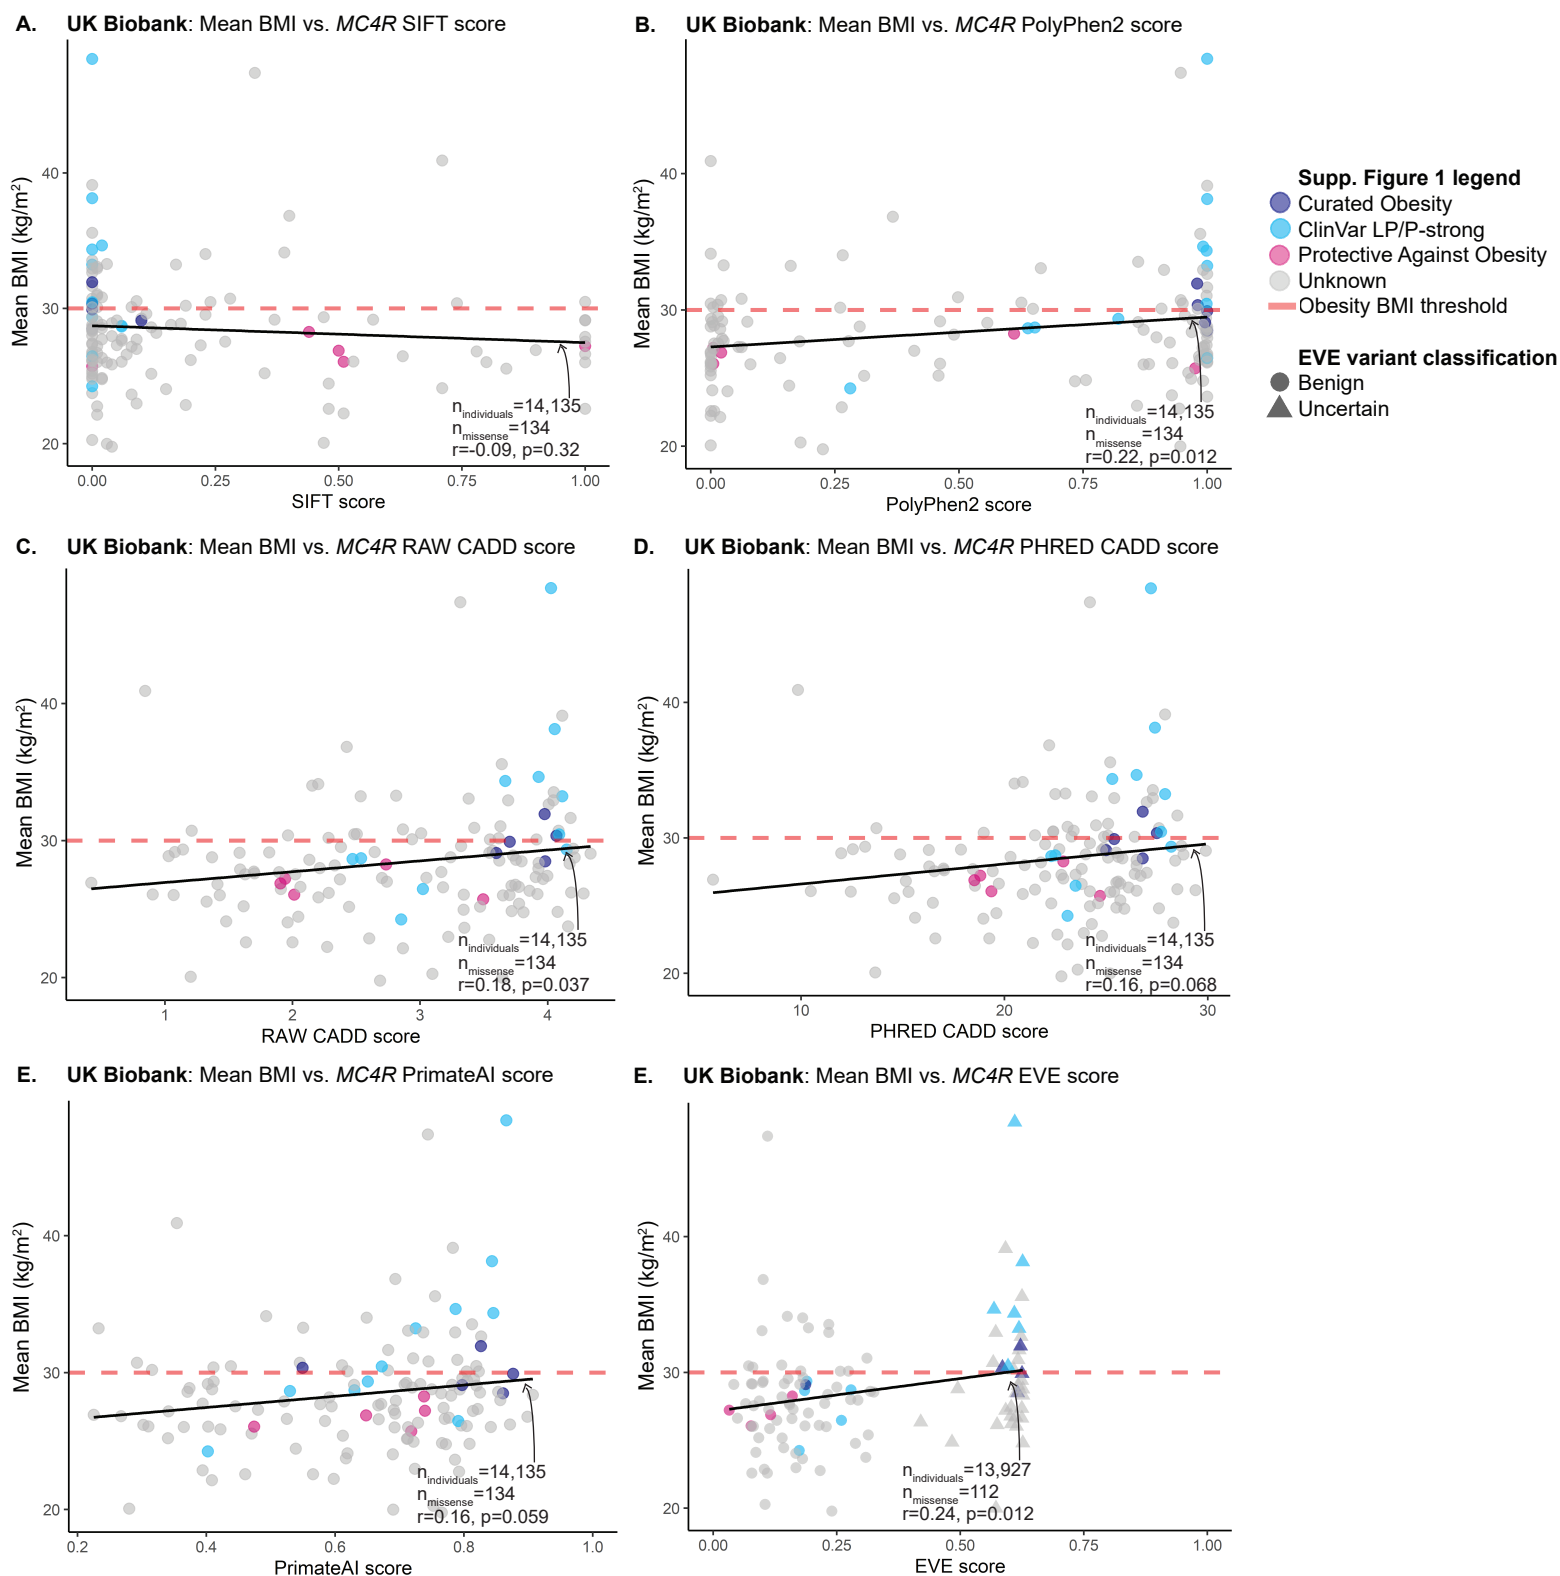

**Supplemental Figure 1: Additional variant pathogenicity predictors do not predict mean phenotype as accurately as ESM1b.** Phenotype correlations were also compared against additional variant pathogenicity prediction methods (A-SIFT, B-PolyPhen2, C-RAW CADD, D-PRED CADD, E-PrimateAI, F-EVE). These methods have lower Pearson correlations with mean BMI compared to ESM1b and do not differentiate between GOF and LOF missense variants in *MC4R*. EVE also does not have full coverage of all *MC4R* missense variants.

## Supplemental Figure 2

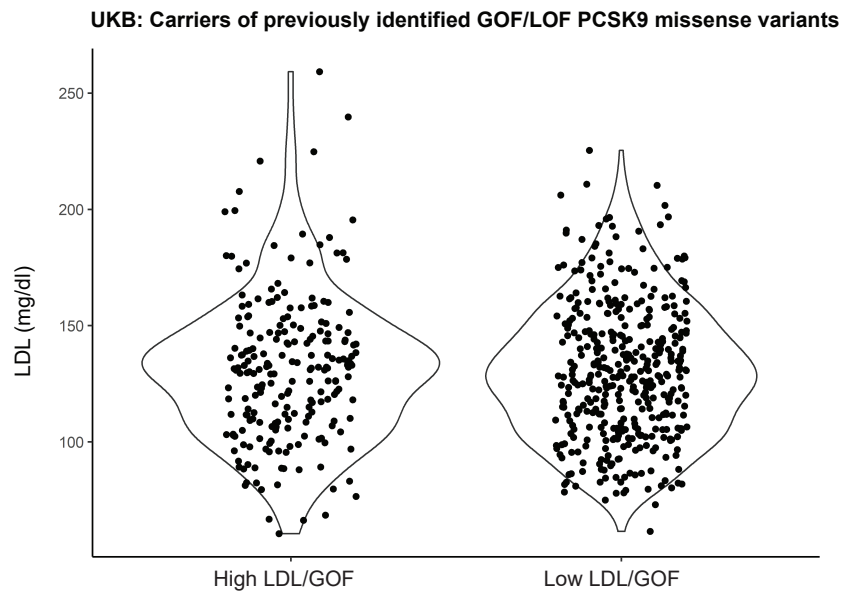

**Supplemental Figure 2: Carriers of GOF/LOF *PCSK9* missense variants do not have significantly different LDL levels in UKB.** Carriers of *PCSK9* GOF (n=216) and LOF (n=398) missense variants were identified. After adjusting for age, sex, and 1st 10 PCs, carrying a GOF or LOF variant was not significantly associated with LDL levels within these carriers.
